# Supplementary material for: Atypical Ductal Hyperplasia and Lobular In Situ Neoplasm: High-Risk Lesions Challenging Breast Cancer Prevention
Source: MDPI journal article supplement (doi:10.3390/cancers16040837), 2024-02-19
Supplement: s1 [file s1]

**Table S1. Distribution of patients by age group.**

| Variable                      | Level | ADH<br>(N=120) | LIN 1/2<br>(N=126) | P-value |
|-------------------------------|-------|----------------|--------------------|---------|
| Age at VABB, median (min-max) |       | 52 (31-78)     | 49 (37-70)         | 0.056   |
| Age at VABB, N (%)            | <50   | 47 (39.2)      | 67 (53.2)          | 0.028   |
|                               | ≥50   | 73 (60.8)      | 59 (46.8)          |         |
| Age at VABB, N (%)            | <45   | 24 (20.0)      | 26 (20.6)          | 0.025   |
|                               | 45-55 | 47 (39.2)      | 68 (54.0)          |         |
|                               | >55   | 49 (40.8)      | 32 (25.4)          |         |
